# Supplementary material for: Elevated Hemolysis Index is associated with higher risk of cardiovascular diseases
Source: publisher site journal article supplement (doi:10.1515/cclm-2023-0114), 2023-02-23
Supplement: Supplementary file 1 [file j_cclm-2023-0114_suppl.docx]

**Supplemental for the manuscript:**

**Elevated Hemolysis Index is strongly associated with**

**higher risk of cardiovascular diseases**

**Authors:**

Charlotte Gils1,2*, Dennis Lund Hansen2,3*, Mads Nybo1,2, Henrik Frederiksen2,3

**Affiliations:**

1Department of Clinical Biochemistry, Odense University Hospital, Odense, Denmark

2 Department of Clinical Research, University of Southern Denmark, Odense, Denmark

3 Department of Hematology, Odense University Hospital, Odense, Denmark

* Contributed equally to this manuscript

**Methods**

*Hemolysis Index measurement*

Pre-programmed mathematic formulas for the HI used the absorbance readings to calculate the HI values. The HI formula used for Architect is HI = Correction factor for sample dilution x (Constant for interfering substance x A500/524 nm + Constant for interfering substance x A572/604 nm + Constant for interfering substance x 628/660 nm + Constant for interfering substance x 524/804 nm) (18). Local verification of the HI analysis on Architect c8000/c16000 revealed an intra-serial imprecision from 0.3-1.2 % and intermediate imprecision of 0.6-3.0 % tested in the HI concentration range from 0.2 – 25.0 g/L. The highest intra-serial and intermediate imprecision was found for the lowest HI concentration of 0.2 g/L. Linear agreement between the HI analysis on Architect and the reference method for hemoglobin measurement was good (r2 for linear regression: 0.99; regression equation: y = 1.03x + 0.19; 95 % CI for slope: 1.02 – 1.04 g/L, 95 % CI for intercept: -0.30 - -0.09 g/L) and no systematic bias for HI levels above 2 g/L was found (16).

**Supplemental Table 1.** ICD-10 diagnosis codes of cardiovascular events in a study of cardiovascular disease risk among persons with an elevated Hemolysis Index (HI+) in blood samples analyzed on chemistry equipment and age-sex matched comparators subjected to blood sampling and from the general population.

**Grouping ICD-10 diagnosis codes from the Danish National Patient Register (DNRP)**

| Group | Disease | ICD-10 |
| --- | --- | --- |
| Arterial diseases | Acute myocardial infarction (AMI) | I21-I23 |
|  | Overall stroke | I61, I63, I64 |
|  | Ischemic stroke | I63 |
|  | Peripheral arterial disease (PAD) | I702 |
| Venous diseases | Venous thromboembolism (VTE) | I26, I80.1-I80.9 |
|  | Splanchnic vein thrombosis (SVT) | I81, I82.0, K550H |

**Supplemental Table 2.** ICD-10 diagnosis codes of comorbidity in a study of cardiovascular disease risk among persons with an elevated Hemolysis Index (HI+) in blood samples analyzed on chemistry equipment and age-sex matched comparators subjected to blood sampling and from the general population.

**Grouping ICD-10 diagnosis codes from the Danish National Patient Register (DPNR)**

| Disease | ICD-10 |
| --- | --- |
| HIV infection | B20-B24 |
| Antiphospholipid syndrome | D686F, R768D |
| Alcohol related disease | E592A, F101-F109, G312, K700-K703, K709, L278A, =354, Q860, T500A, Z502, Z714 |
| Atrial fibrillation | I48 |
| Chronic pulmonary disease | J40-J67, J684, J701, J703, J841, J920, J961, J982-J983 |
| Coagulopathy | D66, D67, D680, D681, D682, D689, D691, D693, D694 |
| Congestive heart failure | I099, I110, I130, I132, I255, I420, I425, I426, I427, I428, I429, I43, I50, P290 |
| Connective tissue disease | M05, M06, M08, M09, M30-M36, D86 |
| Dementia | F00-F03, F051, G30, G311 |
| Diabetes | E102-E108, E112-E118, E122-E128, E132-E138, E142-E148 |
| Dyslipidemia | E780-E785 |
| Hemiplegia | G114, G801, G802, G81, G82, G830, G831, G832, G833, G834, G839 |
| Hypertension | I10-I15 |
| Ischemic heart disease | I21-I23, I120.0, I24.9, I20, I25 |
| Liver disease | B150, B160, B162, B190, I85, I864, I982, K704, K711, K72, K765, K766, K767 |
| Renal disease | N00-N05, N07, N11, N14, N17-N19, N250, Q61, Z940, Z992 |
| Obesity | E65-E68 |

**Supplemental Table 3.** Risk of arterial cardiovascular disease in a study of cardiovascular disease risk among persons with an elevated Hemolysis Index (HI+) in blood samples analyzed on chemistry equipment and age-sex matched comparators subjected to blood sampling and from the general population.

|  | HI+ cohort  n = 43,102 | Blood sample comparator cohort  n = 186,544 | General population comparator cohort  n = 385,040 |
| --- | --- | --- | --- |
| Numbers with arterial cardiovascular disease | 2.634 | 7.952 | 14.644 |
| Cumulative incidence (%) |  |  |  |
| 1 year | 2.58 [2.43;2.73] | 2.13 [2.06;2.20] | 1.02 [0.99;1.06] |
| 5 years | 7.12 [6.84;7.41] | 5.75 [5.61;5.89] | 4.53 [4.45;4.61] |
| Cause-specific hazard ratio and hazard ratio |  |  |  |
| csHR (95% CI)  Unadjusted/adjusted | 1.27 [1.21;1.32] / 1.11 [1.06;1.16] | 1.00 [.;.] /  1.00 [.;.] | 0.71 [0.69;0.73] /  0.75 [0.73;0.77] |
| subHR (95% CI)  Unadjusted/adjusted | 1.22 [1.17;1.27] / 1.04 [1.00;1.09] | 1.00 [.;.] /  1.00 [.;.] | 0.74 [0.72;0.76] /  0.81 [0.78;0.83] |

Abbreviations for Supplemental Table 3: csHR: Cause-specific hazard ratio; subHR: Subdistribuion hazard ratio

**Supplemental Table 4.** Risk of venous cardiovascular disease in a study of cardiovascular disease risk among persons with an elevated Hemolysis Index (HI+) in blood samples analyzed on chemistry equipment and age-sex matched comparators subjected to blood sampling and from the general population.

|  | HI+ cohort  n = 43,102 | Blood sample comparator cohort  n = 186,544 | General population comparator cohort  n = 385,040 |
| --- | --- | --- | --- |
| Numbers with venous cardiovascular disease | 967 | 2.924 | 4.755 |
| Cumulative incidence (%) |  |  |  |
| 1 year | 0.93 [0.85;1.03] | 0.81 [0.77;0.86] | 0.31 [0.29;0.32] |
| 5 years | 2.59 [2.42;2.77] | 2.09 [2.01;2.17] | 1.50 [1.45;1.54] |
| Cause-specific hazard ratio and hazard ratio |  |  |  |
| csHR (95% CI)  Unadjusted/adjusted | 1.26 [1.17;1.35] / 1.15 [1.07;1.24] | 1.00 [.;.] /  1.00 [.;.] | 0.63 [0.63;0.65] /  0.65 [0.62;0.68] |
| subHR (95% CI)  Unadjusted/adjusted | 1.21 [1.12;1.30] / 1.09 [1.01;1.17] | 1.00 [.;.] /  1.00 [.;.] | 0.65 [0.62;0.68] /  0.69 [0.66;0.72] |

Abbreviations for Supplemental Table 4: csHR: Cause-specific hazard ratio; subHR: Subdistribuion hazard ratio

**Supplemental Figure 1.** Box plots of HI readings for the HI+ cohort and blood sample comparator cohort


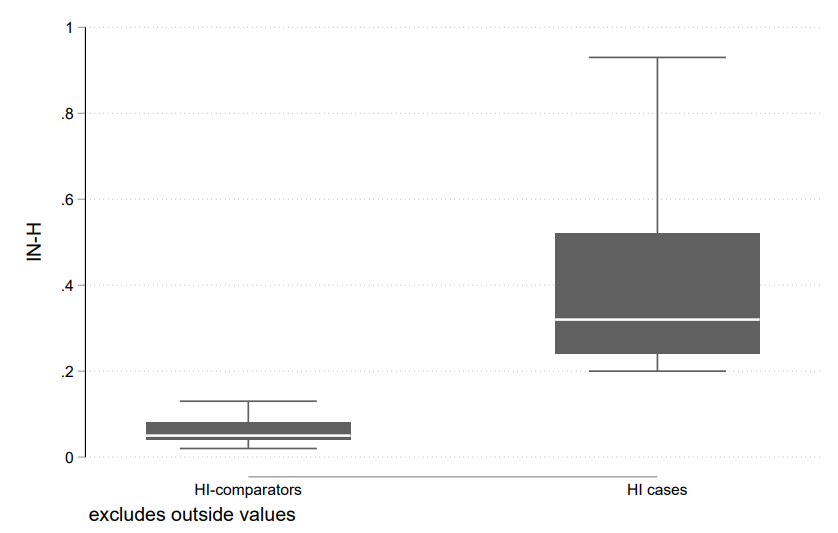


**Supplemental Figure 2.** The distribution of days between the measurements of twice increased HI


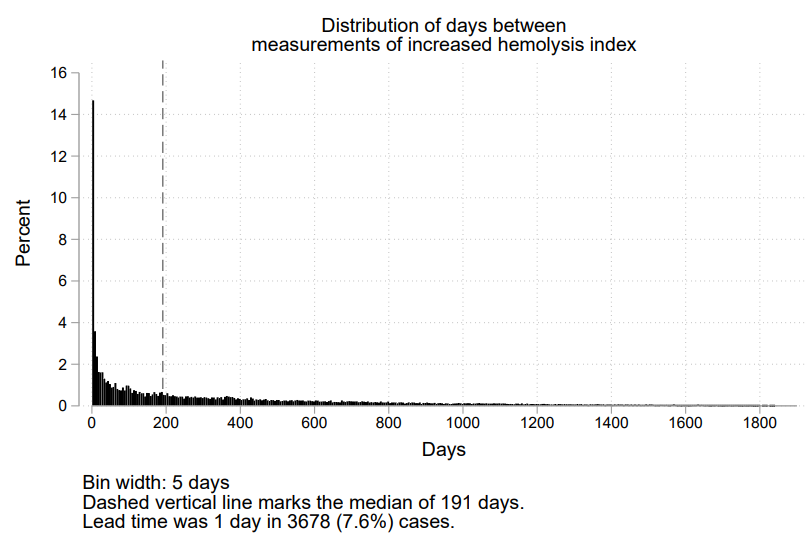


**Supplemental Figure 3.** Cumulative incidences of arterial cardiovascular disease in persons with increased Hemolysis Index (HI+) in blood samples analyzed on chemistry equipment and age-sex matched persons from the blood sample comparator cohort and the general population comparator cohort.

**Supplemental Figure 4.** Cumulative incidences of venous vascular disease in persons with an elevated Hemolysis Index (HI+) in blood samples analyzed on chemistry equipment and age-sex matched persons from the blood sample comparator cohort and the general population comparator cohort.
